# Supplementary material for: Dynamic analysis of Porphyromonas gingivalis invasion into blood capillaries during the infection process in host tissues using a vascularized three-dimensional human gingival model
Source: Royal Society of Chemistry journal article supplement (doi:10.1039/d1bm00831e), 2021-01-01
Supplement: d1bm00831e1.pdf [file d1bm00831e1.pdf]

Supplementary material

**Dynamic analysis of *Porphyromonas gingivalis* invasion into blood capillaries during infection process in host tissue using a vascularized three-dimensional human gingival model**

Naoko Sasaki<sup>a</sup>, Hiroki Takeuchi<sup>b</sup>, Shiro Kitano<sup>a, c</sup>, Shinji Irie<sup>a, c</sup>, Atsuo Amano<sup>b, \*</sup> and Michiya Matsusaki<sup>a, d, \*</sup>

<sup>a</sup>Joint Research Laboratory (TOPPAN) for Advanced Cell Regulatory Chemistry, Graduate School of Engineering, Osaka University, 2-1 Yamadaoka, Suita, Osaka 565-0871, Japan.

<sup>b</sup> Department of Preventive Dentistry, Osaka University Graduate School of Dentistry, 1-8 Yamadaoka, Suita, Osaka 565-0871, Japan.

<sup>c</sup> TOPPAN PRINTING CO., LTD.

<sup>d</sup> Department of Applied Chemistry, Graduate School of Engineering, Osaka University, 2-1 Yamadaoka, Suita, Osaka 565-0871, Japan.

\* Corresponding authors:

Michiya Matsusaki: [m-matsus@chem.eng.osaka-u.ac.jp](mailto:m-matsus@chem.eng.osaka-u.ac.jp)

Department of Applied Chemistry, Graduate School of Engineering, Osaka University, 2-1 Yamadaoka, Suita, Osaka 565-0871, Japan.

TEL: +81-6-6879-7357, FAX: +81-6-6879-7359

Atsuo Amano: [amanoa@dent.osaka-u.ac.jp](mailto:amanoa@dent.osaka-u.ac.jp)

Department of Preventive Dentistry, Osaka University Graduate School of Dentistry, 1-8 Yamadaoka, Suita, Osaka 565-0871, Japan.

TEL: +81-6-6879-2922, FAX: +81-6-6879-2925

Keywords: Collagen microfiber (CMF), *Porphyromonas gingivalis*, Blood capillaries, Epithelial barrier

Supplementary Table S1. Primers and probe list

| Primer                                                     | Sequence                    |
|------------------------------------------------------------|-----------------------------|
| Primers for cell junctions and basement membrane molecules |                             |
| <i>ZO-1</i> Fw                                             | CGAGTTGCAATGGTTAACGGA       |
| <i>ZO-1</i> Rv                                             | TCAGGATCAGGACGACTTACTGG     |
| <i>CLAUDIN-1</i> Fw                                        | ATGAGGATGGCTGTCATTGG        |
| <i>CLAUDIN-1</i> Rv                                        | ATTGACTGGGGTCATAGGGT        |
| <i>CLAUDIN-4</i> Fw                                        | TTGTACCTCGCAGACCATC         |
| <i>CLAUDIN-4</i> Rv                                        | CAGCGAGTCGTACACCTTG         |
| <i>E-CADHERIN</i> Fw                                       | CGAGAGCTACACGTTACGG         |
| <i>E-CADHERIN</i> Rv                                       | GGGTGTCGAGGGAAAAATAGG       |
| <i>COLLAGEN IV</i> Fw                                      | ACAGCCAGACCATTTCAGATC       |
| <i>COLLAGEN IV</i> Rv                                      | GCTGTAAGCGTTTGCGTAGT        |
| MVK Fw                                                     | AAGGTAGCACTGGCTGTATCC       |
| MVK RV                                                     | CCAATGTTGGGTAAGCTGAGG       |
| Primers for <i>P. gingivalis</i>                           |                             |
| 16S rRNA Fw                                                | GCGCTCAACGTTTCAGCC          |
| 16S rRNA Rv                                                | CACGAATTCCGCCTGC            |
| 16S rRNA probe                                             | CACTGAACTCAAGCCCGGCAGTTTCAA |

## Supplementary Figures

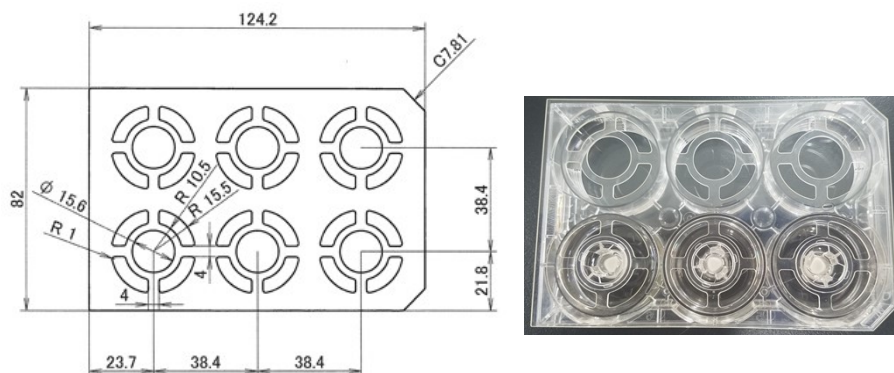

**Figure S1.** Production the 6 well plate adaptor. (A) Illustration of the home-made 6 well plate adaptor. (B) Image of the insert set in the adaptor.

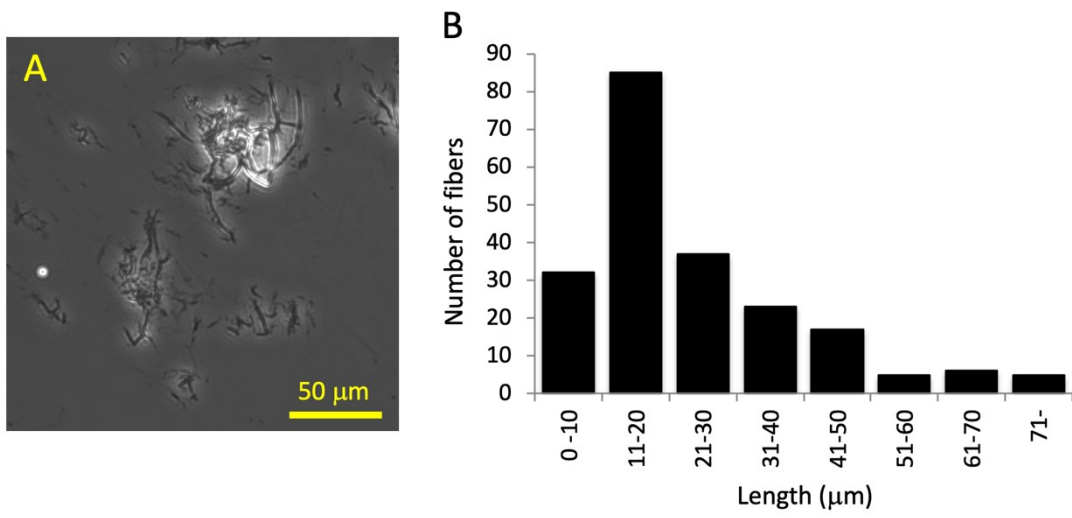

**Figure S2.** Morphology of collagen microfibers. (A) Photograph of CMFs in medium  
(B) Size of CMFs after suspension in medium

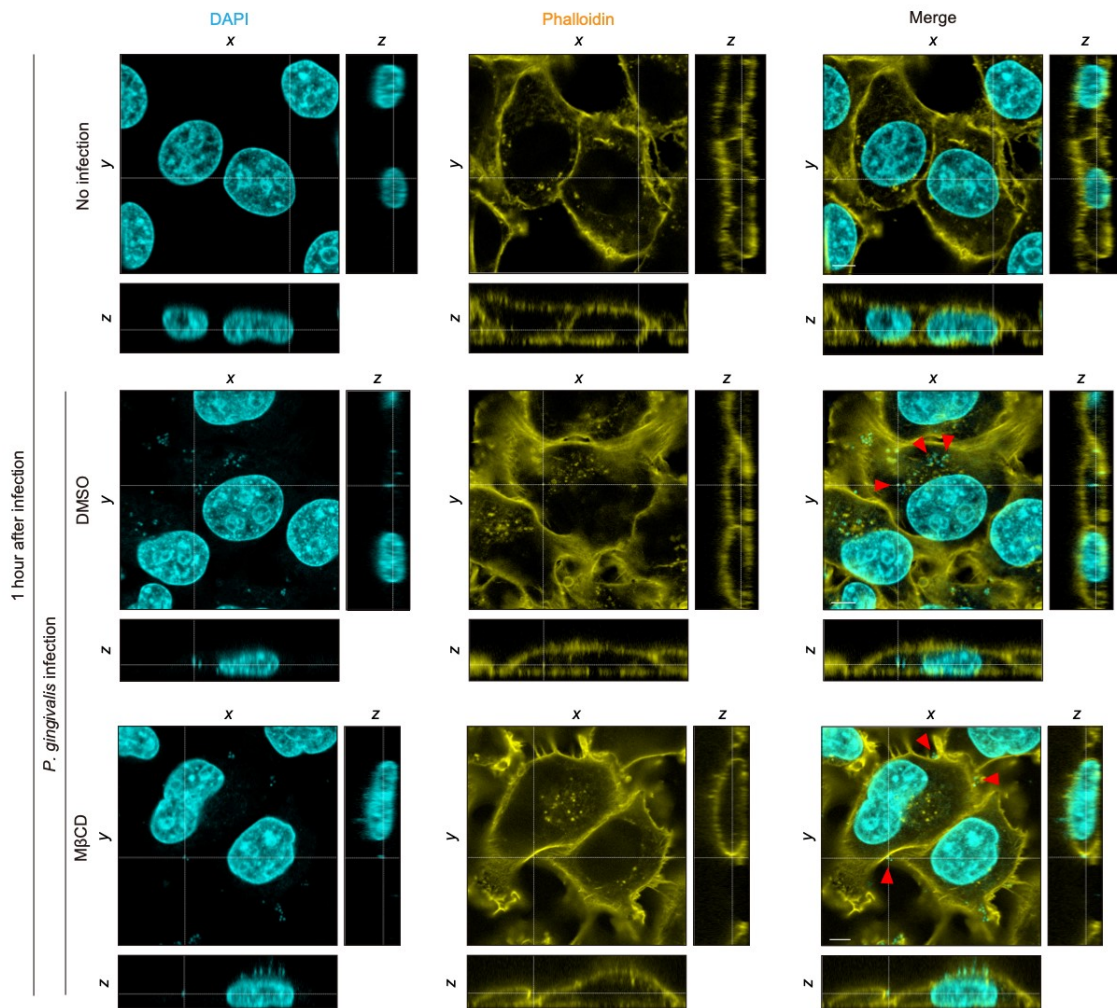

**Figure S3.** M $\beta$ CD inhibits *P. gingivalis* internalization by gingival epithelial cells. Immortalized human gingival epithelial (IHGE) cells were treated with DMSO (Mock) or 1 mM M $\beta$ CD in DMSO. At 30 min after treatment, IHGE cells were infected with *P. gingivalis* ATCC 33277 at an MOI of 100 with DMSO or 1 mM M $\beta$ CD in DMSO for 1 hr, fixed, stained with DAPI (cyan) and Alexa Fluor 568 Phalloidin (yellow), and analyzed by confocal microscopy. The highlight *P. gingivalis* were indicated by red arrow heads. Scale bars, 5  $\mu$ m. See also Figure S4.

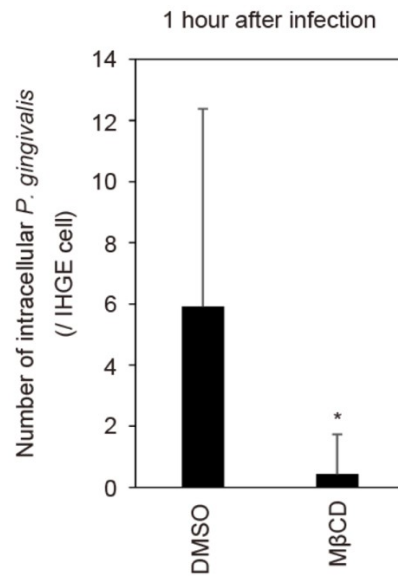

**Figure S4.** Quantification of *P. gingivalis* internalization by IHGE cells in Figure S3. Each bar represents the number of intracellular *P. gingivalis* organisms in a single IHGE cell, which was analysed using projection images. Bacteria located on the inside at a distance of 1  $\mu\text{m}$  from the outermost phalloidin-stained actin filament were manually counted. DMSO: n = 57; M $\beta$ CD: n = 61. \* $p < 0.05$ , two-tailed  $t$ -test.

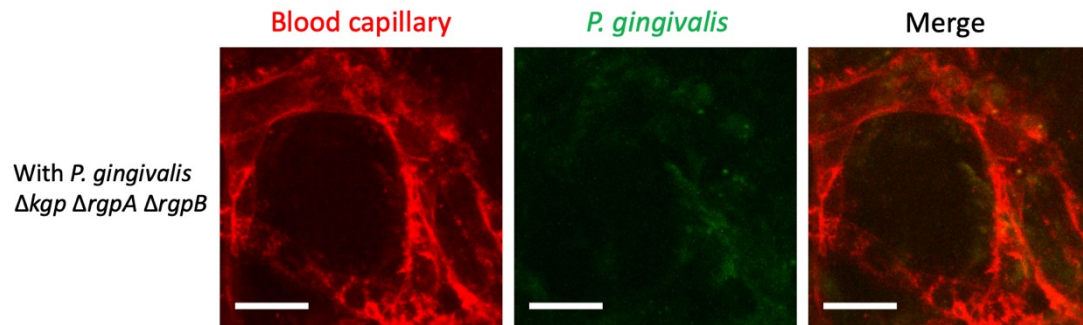

**Figure S5.** Invasion of *P. gingivalis*  $\Delta kgp \Delta rgpA \Delta rgpB$  into the 3D gingival model. The degree of invasion of *P. gingivalis*  $\Delta kgp \Delta rgpA \Delta rgpB$  into the blood capillaries less than WT was observed by confocal laser microscopy. Scale bars are 20  $\mu\text{m}$ . See also Fig. 4C.

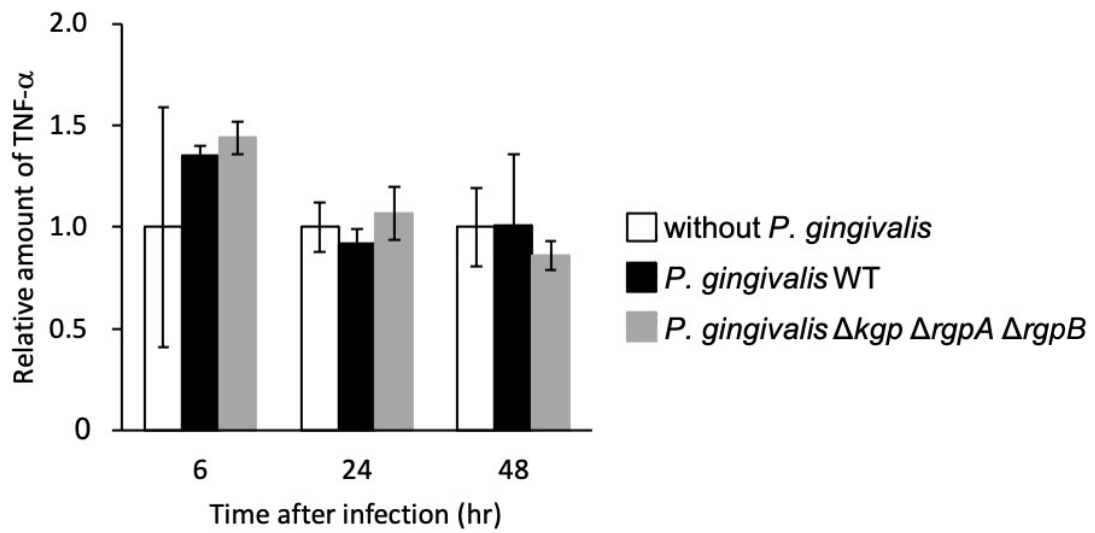

**Figure S6.** Effect of *P. gingivalis* on TNF- $\alpha$  of 3D gingival models.

TNF- $\alpha$  from the 3D gingival models with or without wild and deficient *P. gingivalis* after 6, 24 and 48 hr treatment were detected by ELISA. Each column represents the mean value for three independent tissues, and the error bar represents its standard deviation.
